# Supplementary material for: Blue perovskite light-emitting diodes based on RbX-doped polycrystalline CsPbBr3 perovskite films
Source: Royal Society of Chemistry journal article supplement (doi:10.1039/c9tc01205b), 2019-01-01
Supplement: c9tc01205b1.pdf [file c9tc01205b1.pdf]

*Supplementary information for*

**Blue perovskite light-emitting diodes based on RbX-doped  
polycrystalline CsPbBr<sub>3</sub> films**

Hailong Wang,<sup>a,b</sup> Xiaofei Zhao,<sup>a</sup> Baohua Zhang,<sup>\*c</sup> and Zhiyuan Xie<sup>\*a,b</sup>

<sup>a</sup> State Key Laboratory of Polymer Physics and Chemistry, Changchun Institute of Applied Chemistry, Chinese Academy of Sciences, Changchun 130022, P. R. China

<sup>b</sup> University of Science and Technology of China, Hefei 230026, P.R. China

<sup>c</sup> Center for Advanced Analytical Science, c/o School of Chemistry and Chemical Engineering, Guangzhou University, Guangzhou 510006, P.R. China.

\* Corresponding authors - E-mail address: ccbhzhang@gzhu.edu.cn (B.-H. Zhang), xiezy\_n@ciac.ac.cn (Z.-Y. Xie).

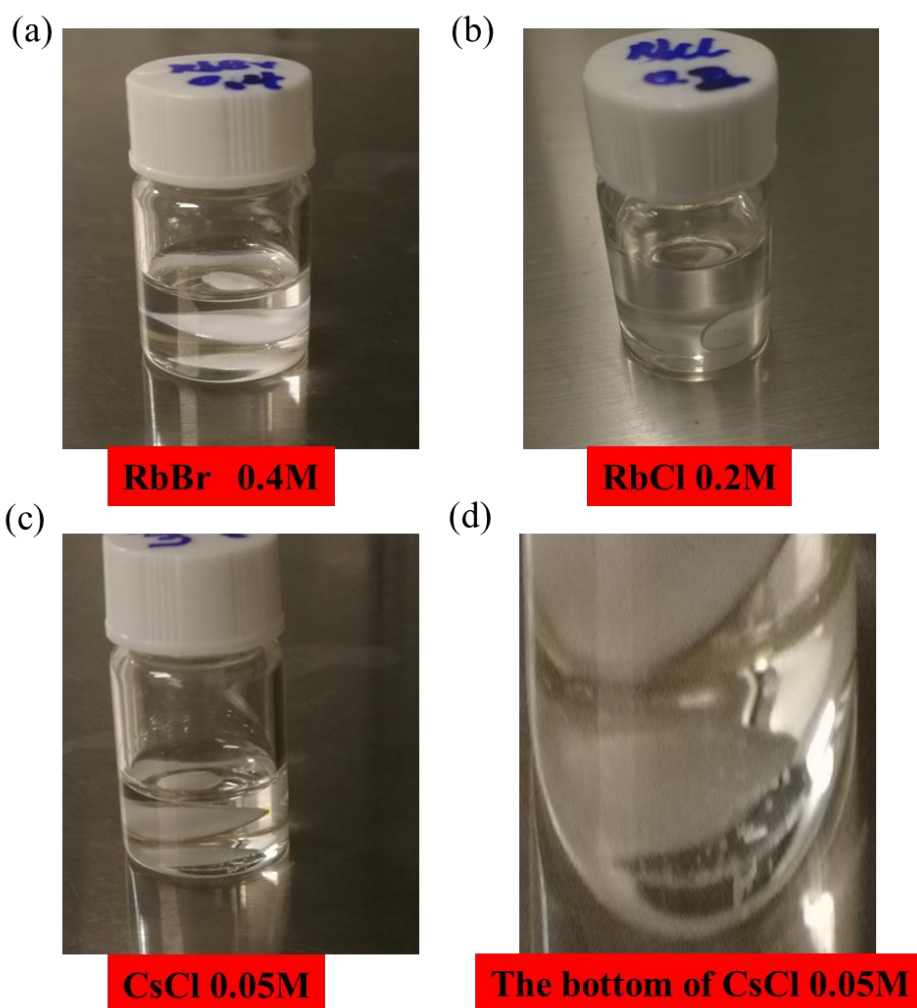

**Figure S1.** The solutions of different halide with various concentrations. It is noticed that the DMSO solutions of RbBr and RbCl are clean with the concentration of 0.4M and 0.2M respectively. But the 0.05M solution of CsCl is not completely dissolved and some CsCl solids are presented at the bottom of bottle. The RbBr and RbCl solutions are stirred at 70°C for 2h. And the CsCl solution is stirred at 70 °C over 24h.

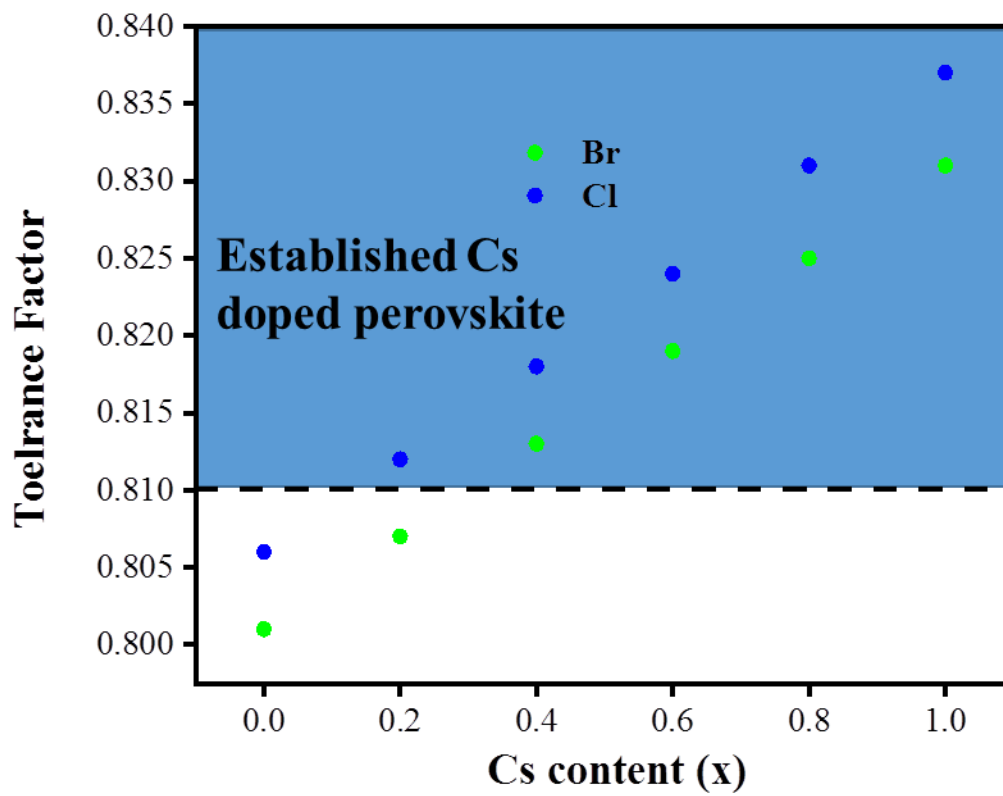

**Figure S2.** Tolerance factor of  $\text{Cs}_x\text{Rb}_{1-x}\text{PbBr}(\text{Cl})_3$  with different compositions.

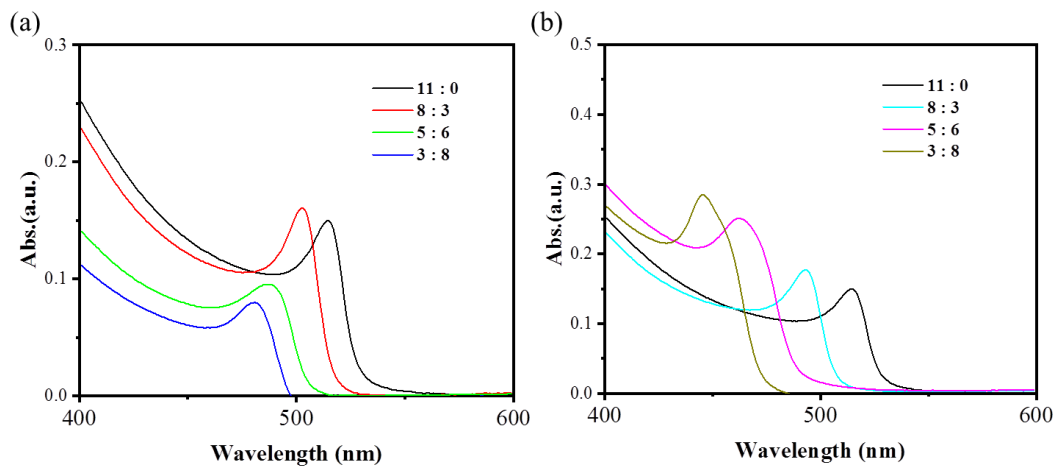

**Figure S3.** The absorption spectra of perovskite films prepared with different molar ratios of CsBr: RbBr (a) and CsBr:RbCl (b).

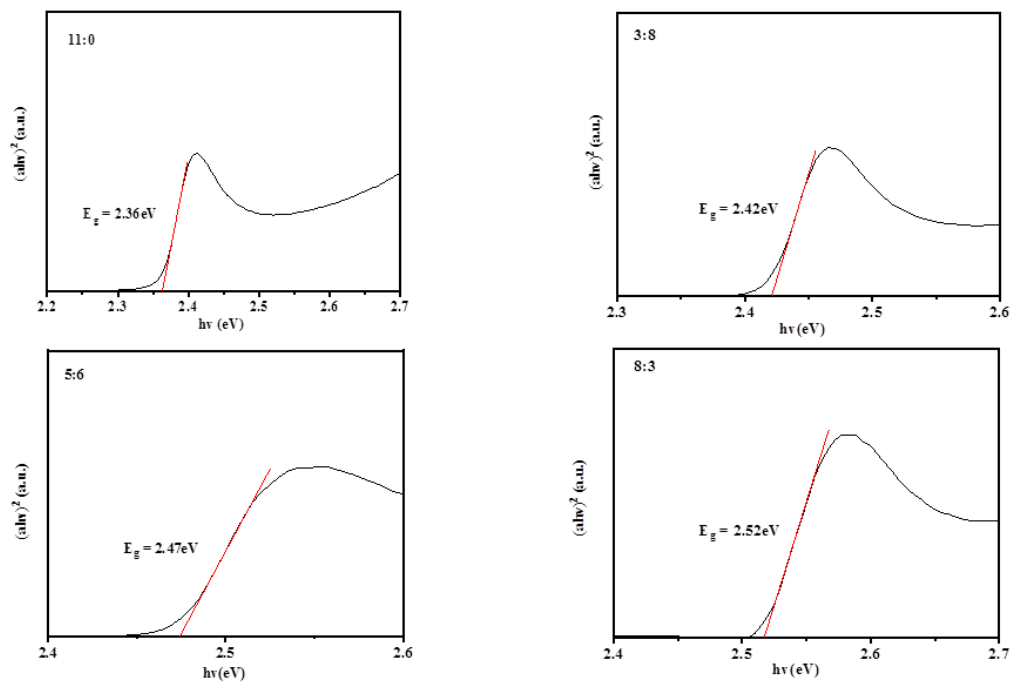

**Figure S4.** Tauc plots of the perovskite films prepared with different molar ratios of CsBr:RbBr.

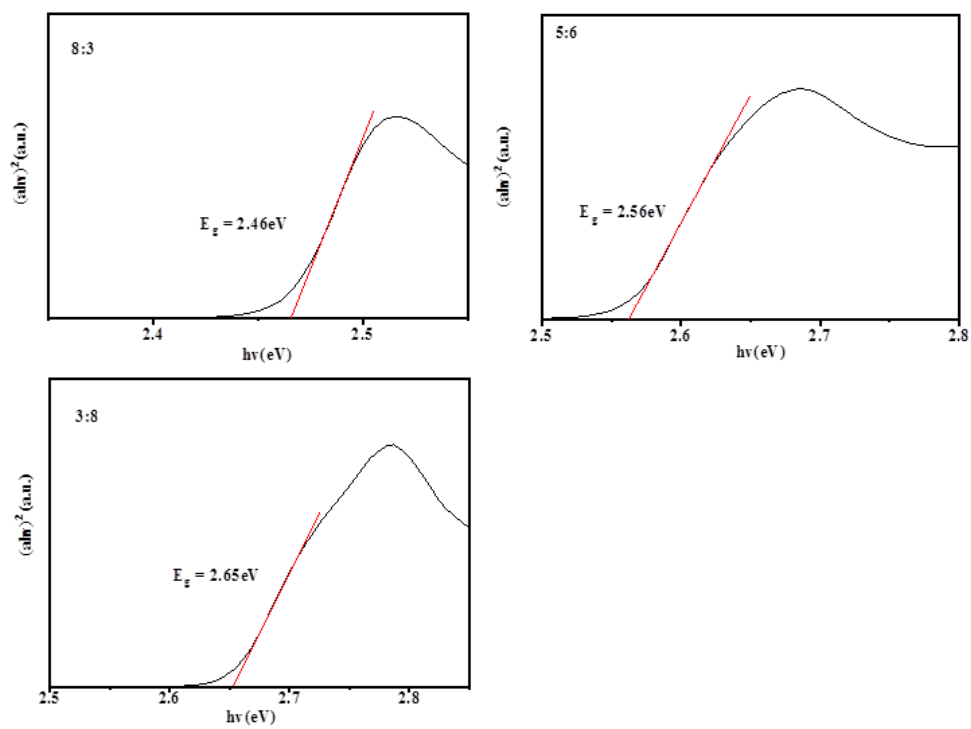

**Figure S5.** Tauc plots of the perovskite films prepared with different molar ratios of CsBr and RbCl.

**Table S1.** Calculated band gap and PL peak position from absorption spectra (Figure S3) and PL spectra (Figure 1c) respectively.

|                          | <b>CsBr : RbBr</b> |       |       |       | <b>CsBr : RbCl</b> |       |       |
|--------------------------|--------------------|-------|-------|-------|--------------------|-------|-------|
|                          | 11 : 0             | 8 : 3 | 5 : 6 | 3 : 8 | 8 : 3              | 5 : 6 | 3 : 8 |
| Band Gap<br>(eV)         | 2.36               | 2.42  | 2.47  | 2.52  | 2.46               | 2.56  | 2.65  |
| PL peak position<br>(nm) | 524                | 510   | 498   | 492   | 505                | 477   | 473   |

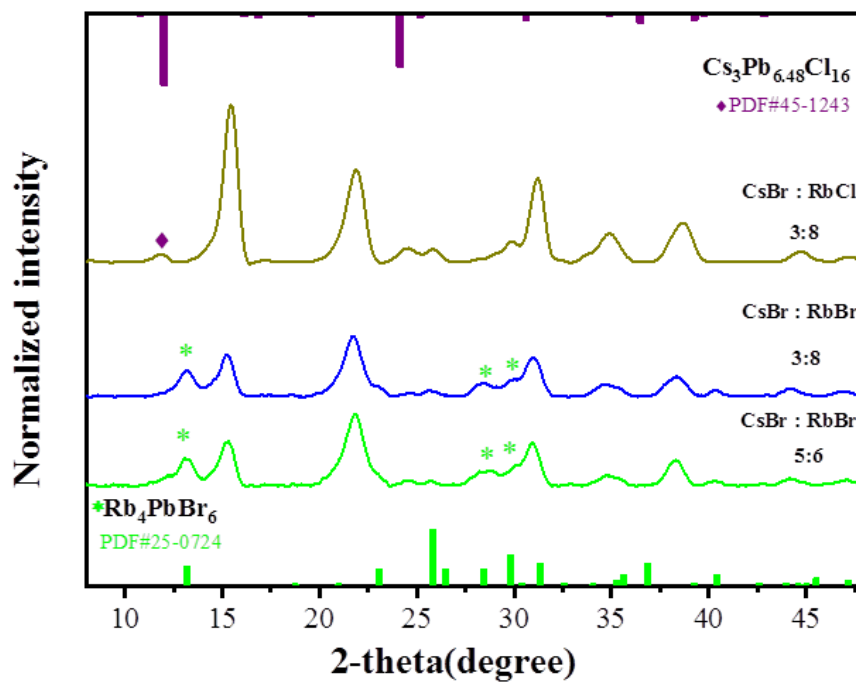

**Figure S6.** The XRD patterns of the perovskite films prepared with various CsBr:RbBr and CsBr:RbCl molar ratios. (upper reference is  $\text{Cs}_3\text{Pb}_{6.48}\text{Cl}_{16}$  PDF# 45-1243, bottom reference is  $\text{Rb}_4\text{PbBr}_6$  PDF# 18-0364).



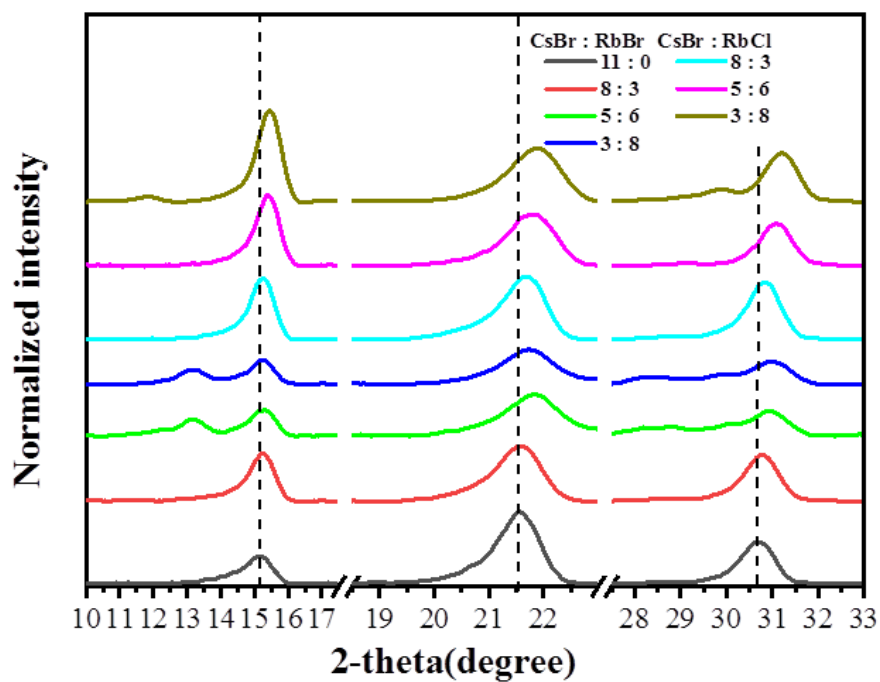

**Figure S7.** The zoom-in XRD patterns of the perovskite films prepared with various CsBr:RbBr and CsBr:RbCl molar ratios.

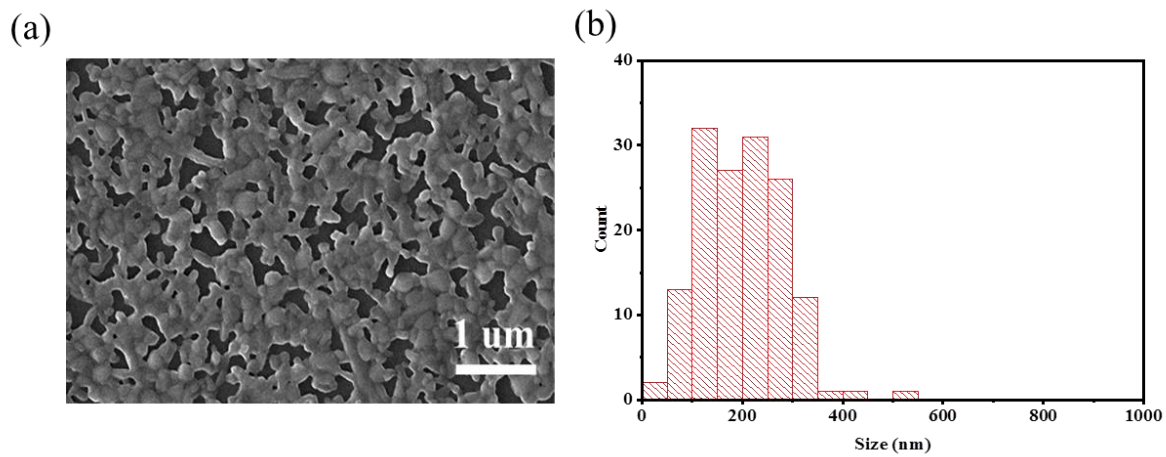

**Figure S8.** Top-view SEM image and calculated grain size distribution for the CsPbBr<sub>3</sub> perovskite films without doping RbX.

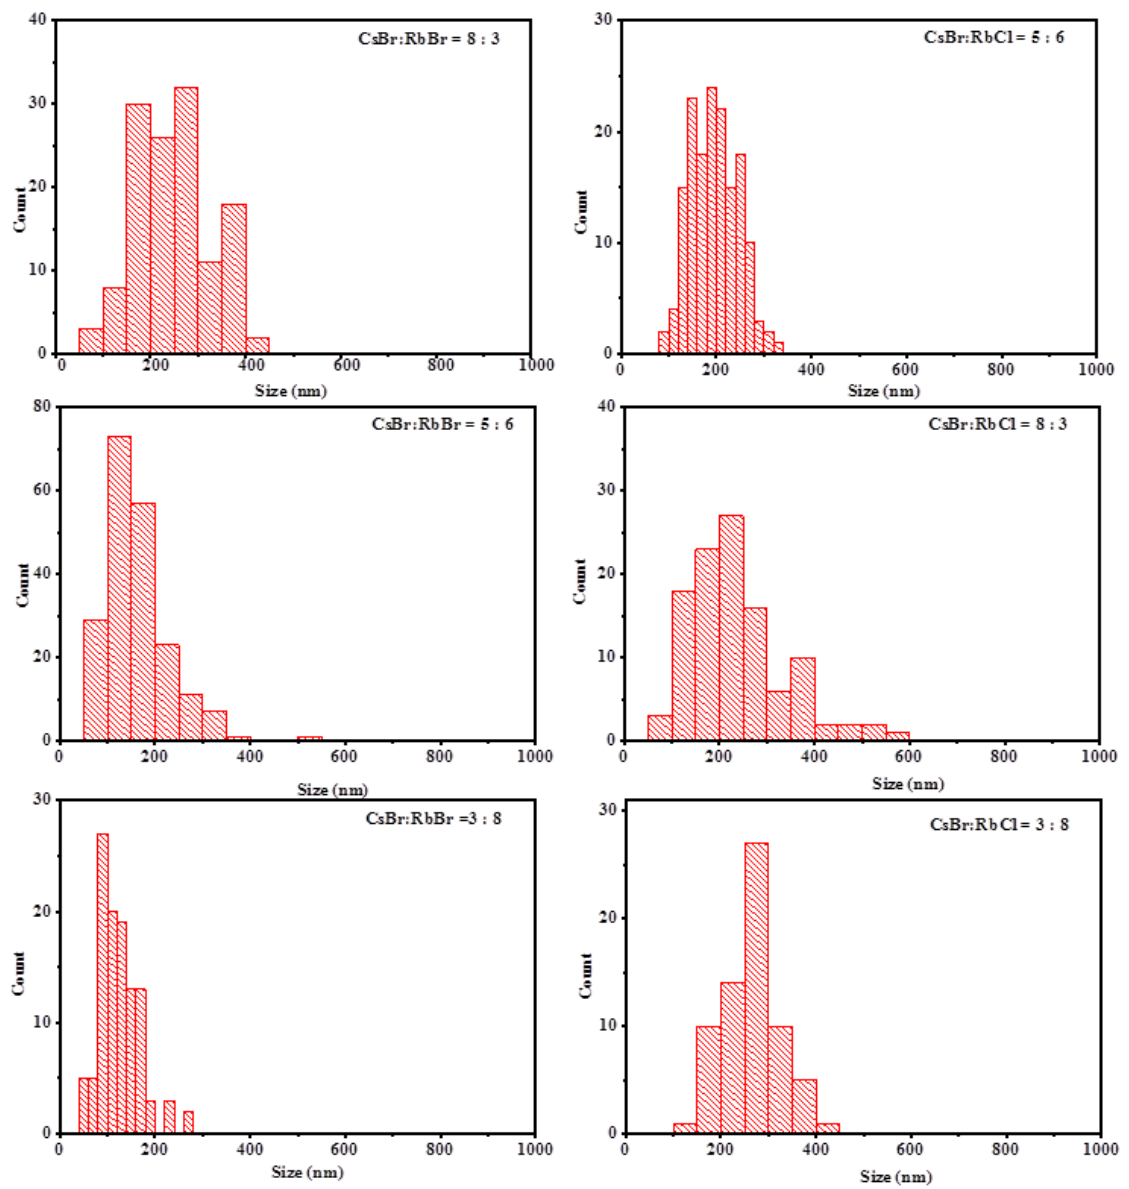

**Figure S9.** Calculated grain size Distribution of the perovskite films prepared with various CsBr:RbBr and CsBr:RbCl molar ratios.

**Table S2.** Calculated coverage degree and average grain size of the perovskite films prepared with various CsBr:RbBr and CsBr:RbCl molar ratios from SEM images (Figure 4).

|                                | CsBr : RbBr |       |       |       | CsBr : RbCl |       |       |
|--------------------------------|-------------|-------|-------|-------|-------------|-------|-------|
|                                | 11 : 0      | 8 : 3 | 5 : 6 | 3 : 8 | 8 : 3       | 5 : 6 | 3 : 8 |
| <b>Coverage Degree</b>         | 80%         | 84%   | 92%   | 99%   | 79%         | 95%   | 74%   |
| <b>Average Grain Size (nm)</b> | 200         | 246   | 163   | 124   | 236         | 195   | 264   |

**Table S3.** Bi-exponential fitting results for time-resolved PL spectra of the perovskite films prepared with various CsBr:RbBr and CsBr:RbCl molar ratios.

|                  | <b>Molar ratio<br/>(mol:mol)</b> | <b>F<sub>1</sub><br/>(%)</b> | <b>τ<sub>1</sub><br/>(ns)</b> | <b>F<sub>2</sub><br/>(%)</b> | <b>τ<sub>2</sub><br/>(ns)</b> | <b>R<sup>2</sup></b> | <b>τ<sub>average</sub><br/>(ns)</b> |
|------------------|----------------------------------|------------------------------|-------------------------------|------------------------------|-------------------------------|----------------------|-------------------------------------|
| <b>CsBr:RbBr</b> | 11:0                             | 85.19                        | 11.98                         | 14.81                        | 39.45                         | 0.99989              | 16.05                               |
|                  | 8: 3                             | 99.58                        | 18.84                         | 4.42                         | 305.46                        | 0.99339              | 20.04                               |
|                  | 5: 6                             | 83.05                        | 12.24                         | 16.95                        | 91.63                         | 0.99942              | 25.69                               |
|                  | 3: 8                             | 83.29                        | 12.53                         | 16.71                        | 161.27                        | 0.99744              | 37.39                               |
| <b>CsBr:RbCl</b> | 8: 3                             | 83.19                        | 4.93                          | 16.81                        | 33.27                         | 0.99975              | 9.69                                |
|                  | 5: 6                             | 89.62                        | 9.63                          | 10.38                        | 248.41                        | 0.99737              | 34.41                               |
|                  | 3: 8                             | 93.76                        | 7.12                          | 6.24                         | 235.35                        | 0.99919              | 21.36                               |

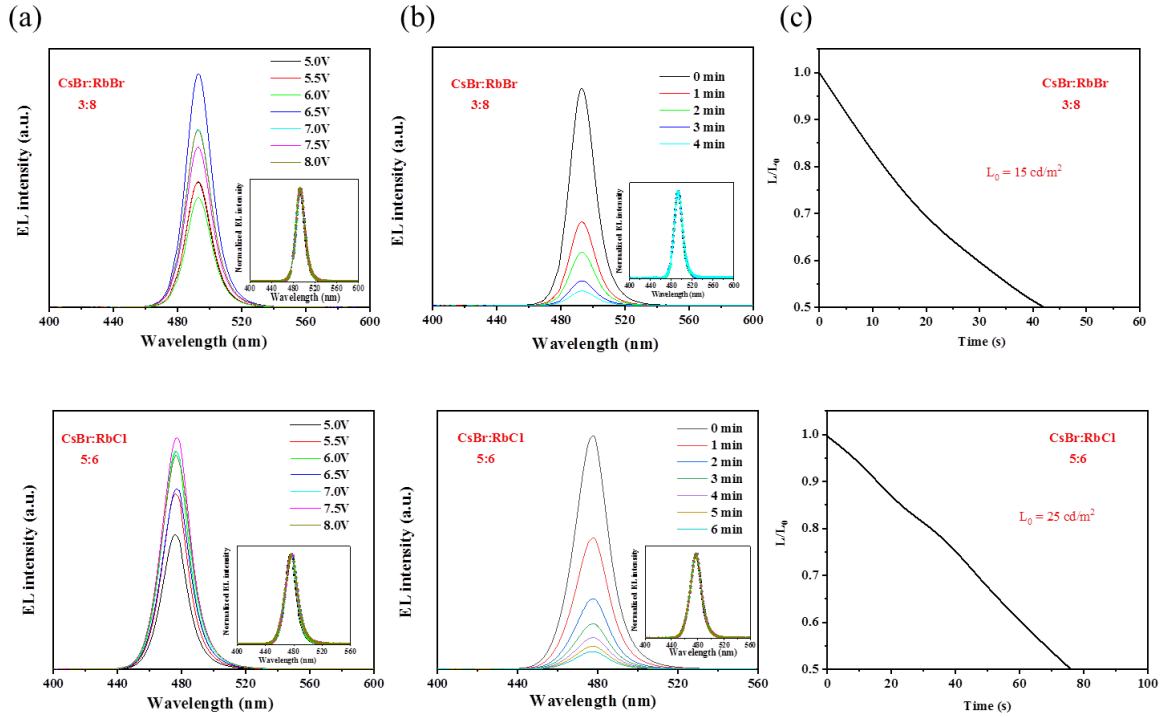

**Figure S10.** (a) EL spectra of the blue PeLEDs under different driving voltages. (b) EL spectra of PeLEDs as a function of operating time. (c) Lifetime measurement of the PeLEDs at given luminances. The inset in (a) and (b) is the corresponding normalized EL spectra.

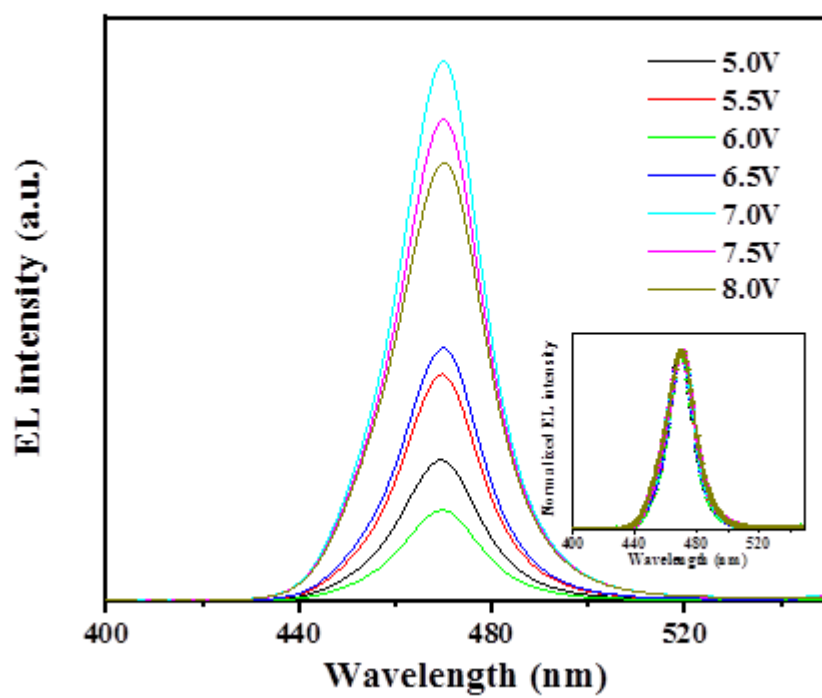

**Figure S11.** EL spectra of the blue PeLEDs based on the CsBr:RbCl (3:8) perovskite EML under different driving voltages. The inset is the corresponding normalized EL spectra.
